# Supplementary material for: CaSPIAN: A Causal Compressive Sensing Algorithm for Discovering Directed Interactions in Gene Networks
Source: PubMed Central journal article supplement (PMC3951243; doi:10.1371/journal.pone.0090781), 2014-03-12
Supplement: pone.0090781.s002.pdf [file pone.0090781.s002.pdf]

## Appendix S2: Tables of multiplicity ratios (MRs) for the *E. coli* SOS network

**Table S1. The adjacency matrix of the SOS network according to Table S4 of [1].** A value 1 in the entry  $(i, j)$  of the table corresponds to a link from the gene indexed by  $j$  to the gene indexed by  $i$ . A value of 0 means that no link was reported in that direction; self links (i.e. loops) are not shown.

|        | dinI | lexA | recA | recF | rpoD | rpoH | rpoS | ssb | umuC/D |
|--------|------|------|------|------|------|------|------|-----|--------|
| dinI   |      | 1    | 1    | 1    | 1    | 0    | 0    | 1   | 1      |
| lexA   | 1    |      | 1    | 1    | 1    | 0    | 0    | 1   | 1      |
| recA   | 1    | 1    |      | 1    | 1    | 0    | 0    | 1   | 1      |
| recF   | 0    | 0    | 0    |      | 1    | 0    | 1    | 0   | 0      |
| rpoD   | 1    | 1    | 1    | 1    |      | 1    | 0    | 1   | 1      |
| rpoH   | 0    | 0    | 0    | 0    | 1    |      | 0    | 0   | 0      |
| rpoS   | 0    | 0    | 0    | 0    | 1    | 0    |      | 0   | 0      |
| ssb    | 1    | 1    | 1    | 1    | 1    | 0    | 0    |     | 1      |
| umuC/D | 1    | 1    | 1    | 1    | 1    | 0    | 0    | 1   |        |

**Table S2. The MR for different links in the SOS network inferred using List-SP for  $k = 4$ .** A value 1 in the entry  $(i, j)$  of the table corresponds to a link from the gene indexed by  $j$  to the gene indexed by  $i$ . A value of 0 shows that no link was found in that direction, in any run of the algorithm.

|        | dinI | lexA | recA | recF | rpoD | rpoH | rpoS | ssb | umuC/D |
|--------|------|------|------|------|------|------|------|-----|--------|
| dinI   |      | 1    | 0.7  | 0    | 0    | 0    | 0    | 0   | 1      |
| lexA   | 1    |      | 1    | 0    | 0    | 0    | 0    | 0   | 0.4    |
| recA   | 0.8  | 1    |      | 0    | 0    | 0    | 0    | 0   | 0.7    |
| recF   | 0.1  | 0    | 0.1  |      | 1    | 0    | 0    | 0   | 0.6    |
| rpoD   | 0    | 0    | 0    | 1    |      | 1    | 0    | 0   | 0      |
| rpoH   | 0    | 0    | 0    | 0    | 1    |      | 0    | 0   | 0      |
| rpoS   | 0    | 0    | 0    | 0    | 0    | 0    |      | 0.1 | 0      |
| ssb    | 1    | 0.2  | 0    | 0    | 0.1  | 0    | 0    |     | 1      |
| umuC/D | 1    | 1    | 0.4  | 0    | 0    | 0    | 0    | 0   |        |

**Table S3. The MR for different links in the SOS network inferred using List-SP for  $k = 5$ .** A value 1 in the entry  $(i, j)$  of the table corresponds to a link from the gene indexed by  $j$  to the gene indexed by  $i$ . A value of 0 shows that no link was found in that direction, in any run of the algorithm.

|        | dinI | lexA | recA | recF | rpoD | rpoH | rpoS | ssb | umuC/D |
|--------|------|------|------|------|------|------|------|-----|--------|
| dinI   |      | 1    | 0.8  | 0    | 0    | 0    | 0    | 0   | 1      |
| lexA   | 1    |      | 1    | 0    | 0    | 0.1  | 0    | 0   | 0.7    |
| recA   | 0.9  | 1    |      | 0    | 0.1  | 0    | 0    | 0   | 0.9    |
| recF   | 0.1  | 0    | 0.1  |      | 1    | 0    | 0    | 0   | 0.6    |
| rpoD   | 0.1  | 0    | 0    | 1    |      | 1    | 0    | 0   | 0.1    |
| rpoH   | 0    | 0    | 0    | 0    | 1    |      | 0    | 0   | 0      |
| rpoS   | 0.1  | 0    | 0    | 0    | 0.1  | 0    |      | 0.1 | 0.1    |
| ssb    | 1    | 0.3  | 0    | 0    | 0.1  | 0    | 0    |     | 1      |
| umuC/D | 1    | 1    | 0.7  | 0    | 0    | 0    | 0    | 0   |        |





## References

1. Gardner TS, di Bernardo D, Lorenz D, Collins JJ (2003) Inferring genetic networks and identifying compound mode of action via expression profiling. *Science* 301: 102-105.
